# Supplementary material for: Metals from spacecraft reentry in stratospheric aerosol particles
Source: PubMed Central journal article supplement (PMC10614211; doi:10.1073/pnas.2313374120), 2023-10-16
Supplement: pnas.2313374120.sapp.pdf [file pnas.2313374120.sapp.pdf]

Supplemental figures

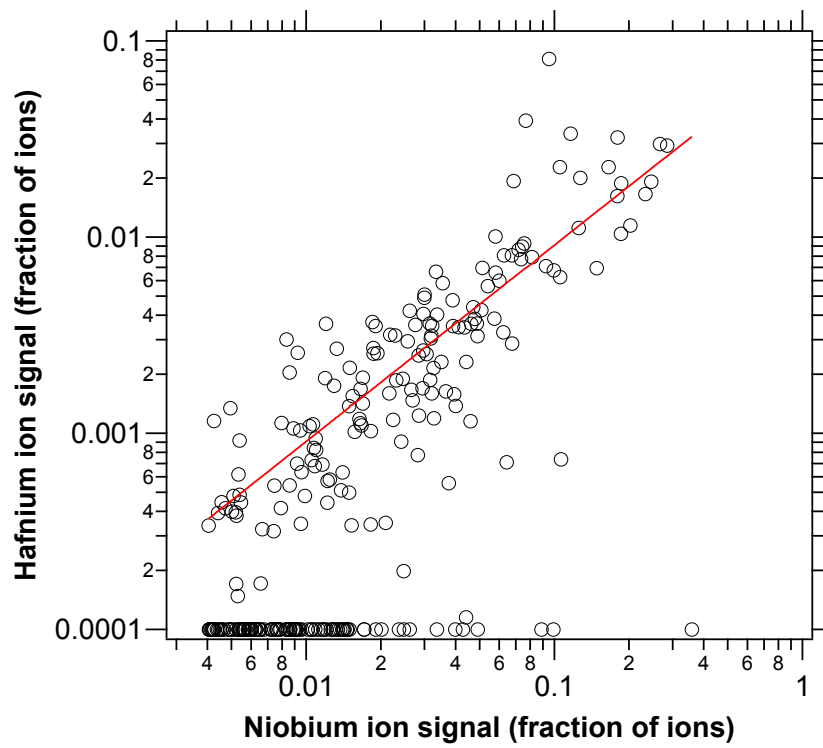

**Supplemental Figure 1. Hafnium ion signals as a function of niobium for mass spectra with a niobium signal of at least 0.4% of the total of all peaks. Hafnium below detection limit is plotted at 0.0001. The red line is a linear fit. Based on the PALMS sensitivity to other metals, the sensitivity to hafnium is likely within a factor of 3 of niobium.**

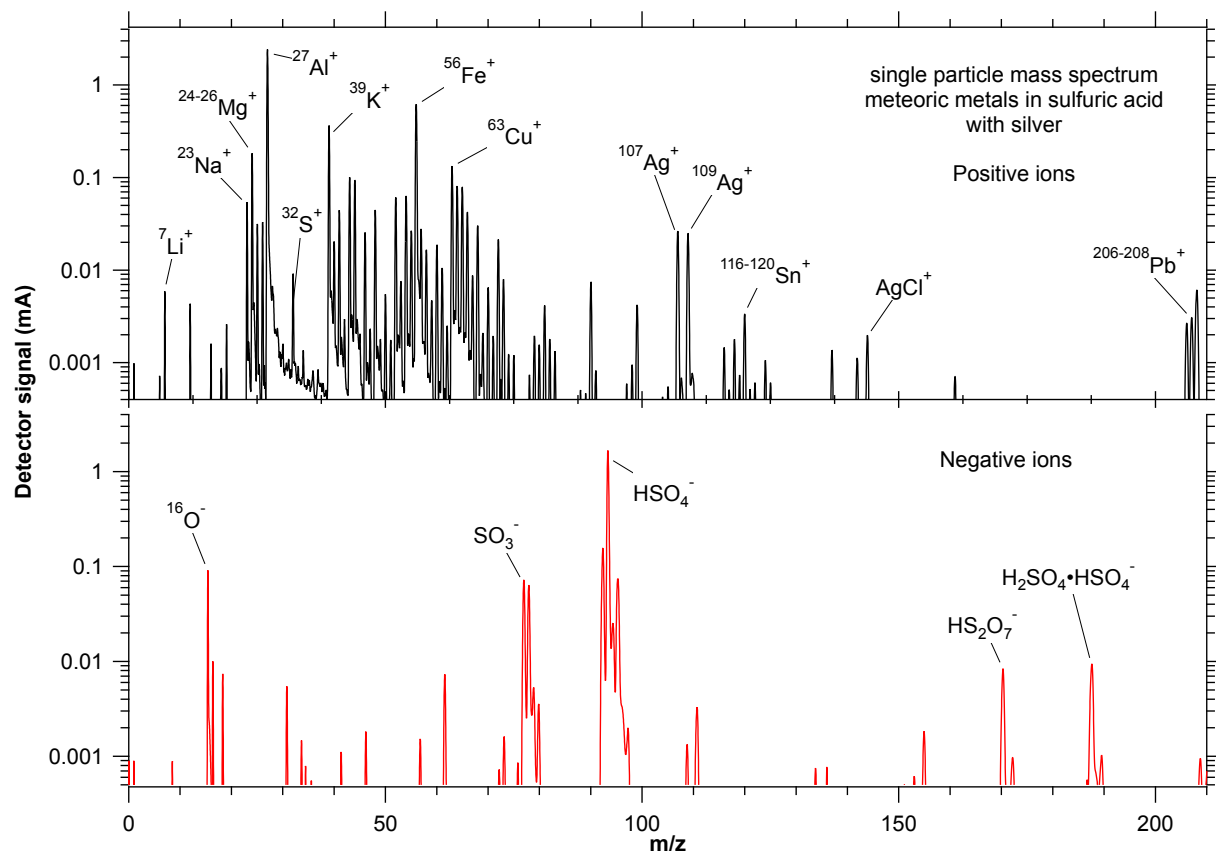

**Supplemental Figure 2. An example of a mass spectrum of a stratospheric sulfuric acid particle containing silver along with meteoric metals.** The association of silver with lithium, aluminum, copper, tin, and lead was common.

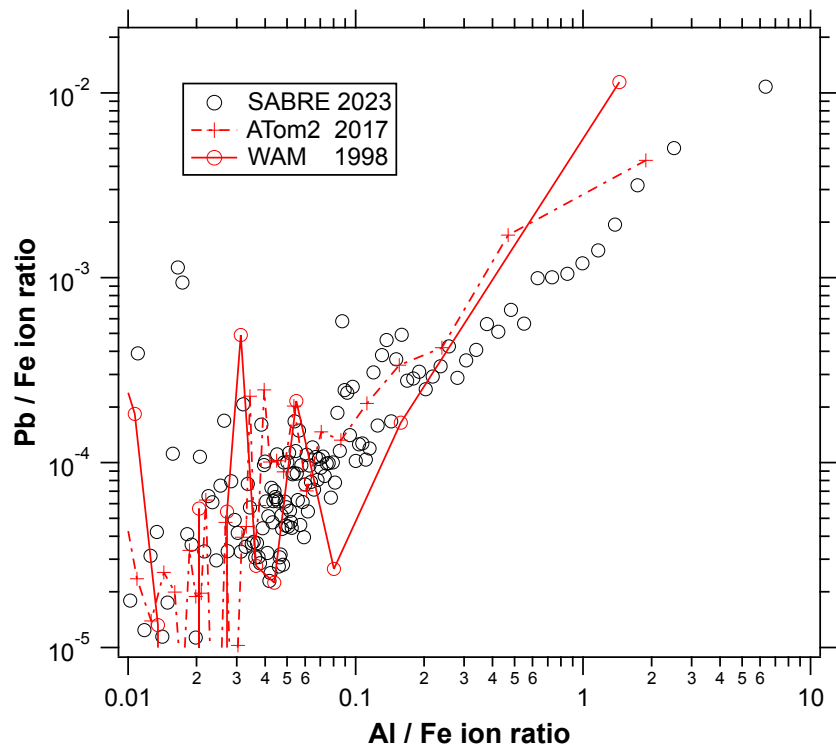

**Supplemental Figure 3. Lead signals relative to aluminum in particles which contain iron.** Each point is the average of the ratios from 1000 (SABRE) or 150 (other missions) mass spectra after sorting the mass spectra by the Al to Fe ion ratio.

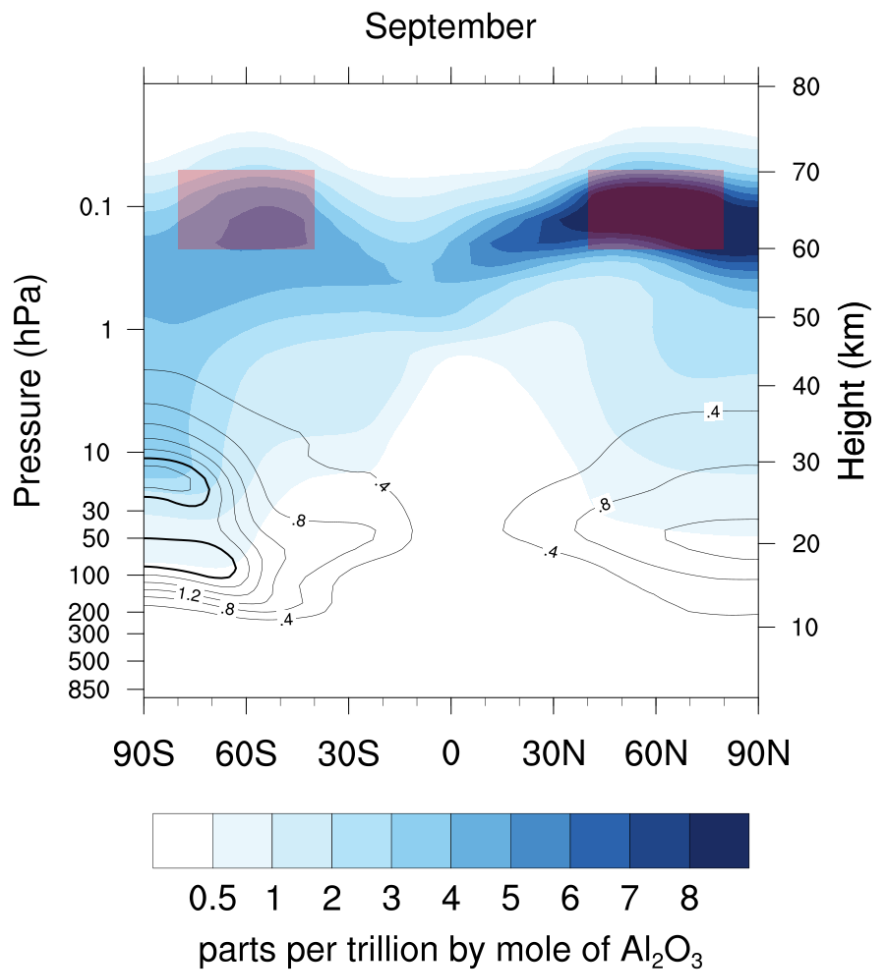

**Supplemental Figure 4. The September average concentrations of reentry  $\text{Al}_2\text{O}_3$  for the 15-year reentry emission simulation.** This can be compared to the March average in Fig. 4. Colored filled contours show the mass mixing ratio and the contour lines show the mass density in  $10^{-16} \text{ g cm}^{-3}$ . The  $2.4 \times 10^{-16} \text{ g cm}^{-3}$  mass density contour line is shown in bold.
